# Supplementary material
Source: PubMed Central journal article supplement (PMC2980569)
Supplement: NIHMS208709-supplement-1_si_001.pdf [file NIHMS208709-supplement-1_si_001.pdf]

## Supporting Information

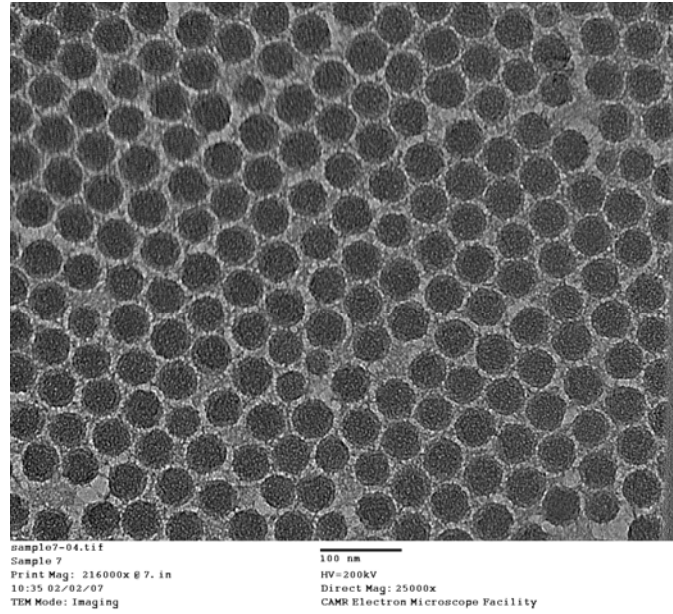

Figure 1. TEM image of close packed f(FL)-NP prepared in ethanol. The scale bar is 100 nm.

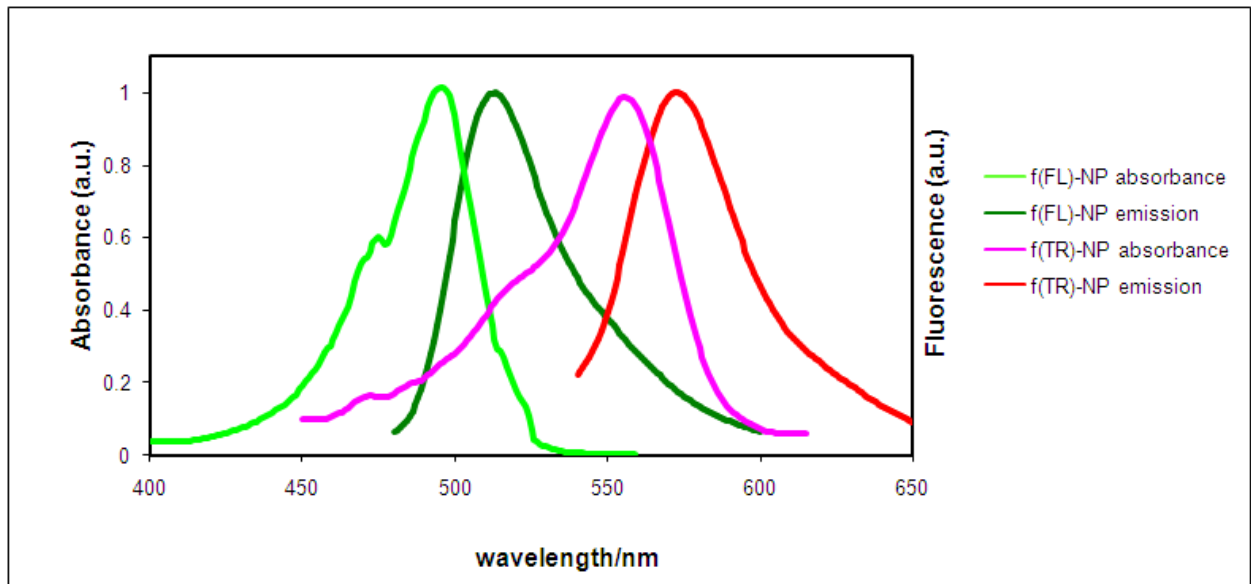

Figure 2. Normalized absorbance and emission spectrum of f(FL)NP and f(TR)NP.

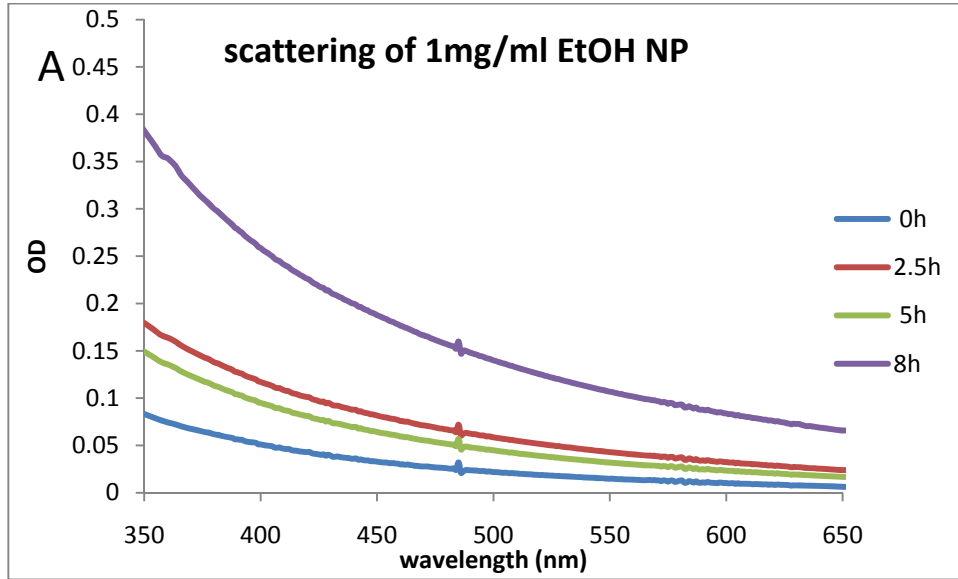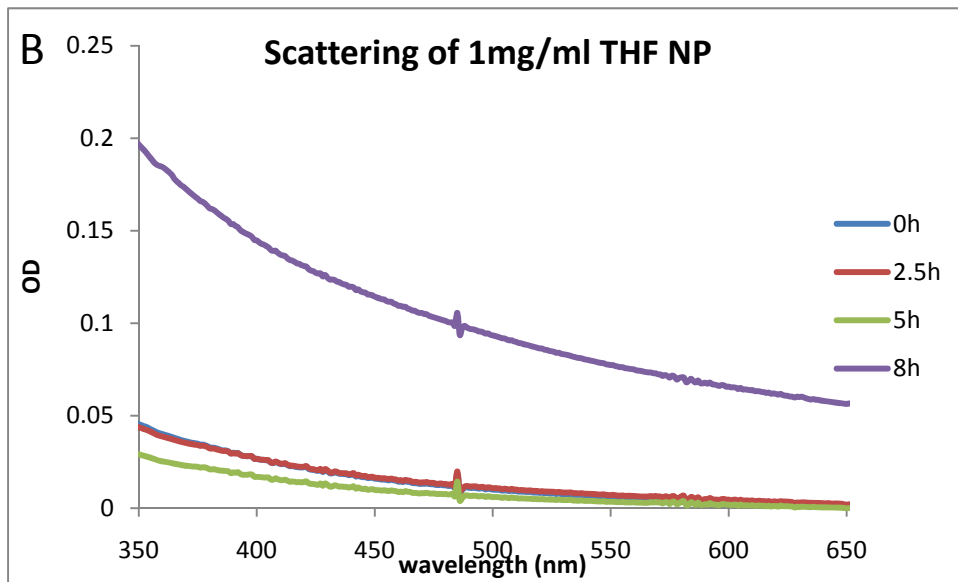

Figure 3 (A) Light scattering line shape of NP prepared by adding 1x APTS/EtOH solution 0-8 hours after the initiation of particle growth. (B) Light scattering line shape of NP prepared by adding APTS/THF solution 0-8 hours after the initiation of particle growth.

Table S1: Full names of ConA primary carbohydrate targets on microarray

| Abbreviation of targets | Type         | Description                                                                                                                                                   |
|-------------------------|--------------|---------------------------------------------------------------------------------------------------------------------------------------------------------------|
| ManT                    | carbohydrate | Man $\alpha$ 1-6[Man $\alpha$ 1-3]Man $\beta$ -BSA                                                                                                            |
| Man7D1                  | carbohydrate | Man $\alpha$ 1-6(Man $\alpha$ 1-3)Man $\alpha$ 1-6(Man $\alpha$ 1-2Man $\alpha$ 1-2Man $\alpha$ 1-3)Man $\beta$ 1-4GlcNAc-BSA                                 |
| Man8D1D3                | carbohydrate | Man $\alpha$ 1-2Man $\alpha$ 1-6(Man $\alpha$ 1-3)Man $\alpha$ 1-6(Man $\alpha$ 1-2Man $\alpha$ 1-2Man $\alpha$ 1-3)Man $\beta$ 1-4GlcNAc-BSA                 |
| Man9                    | carbohydrate | Man $\alpha$ 1-2Man $\alpha$ 1-6(Man $\alpha$ 1-2Man $\alpha$ 1-3)Man $\alpha$ 1-6(Man $\alpha$ 1-2Man $\alpha$ 1-2Man $\alpha$ 1-3)Man $\beta$ 1-4GlcNAc-BSA |
| Man7D3                  | carbohydrate | Man $\alpha$ 1-2Man $\alpha$ 1-6(Man $\alpha$ 1-3)Man $\alpha$ 1-6(Man $\alpha$ 1-2Man $\alpha$ 1-3)Man $\beta$ 1-4GlcNAc-BSA                                 |
| Man5                    | carbohydrate | Man $\alpha$ 1-6(Man $\alpha$ 1-3)Man $\alpha$ 1-6(Man $\alpha$ 1-3)Man $\beta$ 1-4GlcNAc-BSA                                                                 |
| Man3                    | carbohydrate | Man $\alpha$ 1-6(Man $\alpha$ 1-3)Man $\beta$ 1-4GlcNAc -BSA                                                                                                  |
| Tgl                     | Glycoprotein | Thyroglobulin                                                                                                                                                 |
| CEA                     | Glycoprotein | carcinoembryonic antigen                                                                                                                                      |
| Man6                    | carbohydrate | Man $\alpha$ 1-6(Man $\alpha$ 1-3)Man $\alpha$ 1-6(Man $\alpha$ 1-2Man $\alpha$ 1-3)Man $\beta$ 1-4GlcNAc-BSA                                                 |

**Table S2. List of Carbohydrate Microarray Components**

| <u>Group</u>    | <u>Abbreviation</u> | <u>Description</u>                                                                                         |
|-----------------|---------------------|------------------------------------------------------------------------------------------------------------|
| Defined Glycans | 3'SLacNAc           | Sialyl $\alpha$ 2-3Gal $\beta$ 1-4GlcNAc – BSA (3'SLacNAc)                                                 |
|                 | 6'SLac              | Sialyl $\alpha$ 2-3Gal $\beta$ 1-4Glc-APD-HSA (6'SLac)                                                     |
|                 | Adi                 | GalNAc $\alpha$ 1-3Gal $\beta$ -BSA (Adi); 17/BSA                                                          |
|                 | alphaGal            | Gal $\alpha$ 1-3Gal $\beta$ 1-4GlcNAc-BSA (aGal)                                                           |
|                 | Ara5                | Ara $\alpha$ 1-5Ara $\alpha$ 1-5Ara $\alpha$ 1-5Ara $\alpha$ 1-5Ara $\alpha$ 1-BSA (Ara5)                  |
|                 | Bdi                 | Gal $\alpha$ 1-3Gal– BSA (Bdi)                                                                             |
|                 | BG-A                | GalNAc $\alpha$ 1-3(Fuc $\alpha$ 1-2)Gal $\beta$ - BSA [BG-A]                                              |
|                 | BG-A1               | GalNAc $\alpha$ 1-3(Fuc $\alpha$ 1-2)Gal $\beta$ 1-3GlcNAc $\beta$ 1-3Gal $\beta$ 1-4(Glc)-APD-HSA (BG-A1) |
|                 | BG-B (EMD)          | Gal $\alpha$ 1-3(Fuc $\alpha$ 1-2)Gal $\beta$ -BSA [BG-B] from EMD                                         |
|                 | BG-B (Dextra)       | Gal $\alpha$ 1-3(Fuc $\alpha$ 1-2)Gal $\beta$ -BSA [BG-B] from Dextra                                      |
|                 | BG-H1               | Fuc $\alpha$ 1-2Gal $\beta$ 1-3GlcNAc $\beta$ 1-3Gal $\beta$ 1-4Glc $\beta$ –APD-HSA [BG-H1]               |
|                 | BG-H2               | Fuc $\alpha$ 1-2Gal $\beta$ 1-4GlcNAc $\beta$ -HSA (BG-H2)                                                 |
|                 | Cellobiose          | Glc $\beta$ 1-4Glc $\beta$ -BSA (Cellobiose)                                                               |
|                 | Celotriose          | Glc $\beta$ 1-4Glc $\beta$ 1-4Glc $\beta$ -BSA                                                             |
|                 | Chito 3             | GlcNAc $\beta$ 1-4GlcNAc $\beta$ 1-4GlcNAc $\beta$ -BSA (Chito 3)                                          |
|                 | DSLNT               | Sia $\alpha$ 2-3Gal $\beta$ 1-3(Sia $\alpha$ 2-6)GlcNAc $\beta$ 1-3Gal $\beta$ 1-BSA (DSLNT)               |
|                 | Fuc-a               | Fuc- $\alpha$ - BSA                                                                                        |
|                 | Fuc-b               | Fuc- $\beta$ - BSA                                                                                         |
|                 | G2M4                | Man $\beta$ 1-4(Gal $\alpha$ 1-6)Man $\beta$ 1-4(Gal $\alpha$ 1-6)Man $\beta$ 1-4Man $\beta$ 1-BSA (G2M4)  |
|                 | GA1                 | Gal $\beta$ 1-3GalNAc $\beta$ 1-4Gal $\beta$ 1-BSA (GA1tri or asialo-GM1); 20/BSA                          |
|                 | GA2di               | GalNAc $\beta$ 1-4Gal $\beta$ - BSA (GA2di); 16/BSA                                                        |
|                 | Gal3                | Gal $\alpha$ 1-3Gal $\beta$ 1-4Gal $\alpha$ -BSA (Gal3)                                                    |
|                 | Gal-a               | Gal- $\alpha$ - BSA                                                                                        |
|                 | Gala1-4Galb         | Gal $\alpha$ 1-4Gal $\beta$ -CETE(linker)-BSA                                                              |

Wang et. al. Photo- and Bio-physical Studies of Lectin-Conjugated Fluorescent Nanoparticles: Reduced Sensitivity in High Density Assays.

| <b><u>Group</u></b> | <b><u>Abbreviation</u></b>                                                            | <b><u>Description</u></b>                                                                                  |
|---------------------|---------------------------------------------------------------------------------------|------------------------------------------------------------------------------------------------------------|
|                     | Gal-b                                                                                 | Gal- $\beta$ - BSA                                                                                         |
|                     | Galb1-6Man-a                                                                          | Gal $\beta$ 1-6Man- $\alpha$ - BSA                                                                         |
|                     | GalNAc-a                                                                              | GalNAc- $\alpha$ - BSA; 22/BSA                                                                             |
|                     | GalNAca1-6Galb                                                                        | GalNAc $\alpha$ 1-6Gal $\beta$ -BSA; 21/BSA                                                                |
|                     | GalNAc-b                                                                              | GalNAc- $\beta$ - BSA                                                                                      |
|                     | Gb4                                                                                   | GalNAc $\beta$ 1-3Gal $\alpha$ 1-4Gal $\beta$ 1-BSA (Gb4)                                                  |
|                     | Glc-a                                                                                 | Glc- $\alpha$ - BSA                                                                                        |
|                     | Glc $\alpha$ 1-6Glc $\alpha$ 1-4Glc $\alpha$ 1-4Glc $\beta$ -CETE-BSA<br>4Glc $\beta$ | Glc $\alpha$ 1-6Glc $\alpha$ 1-4Glc $\alpha$ 1-4Glc $\beta$ -CETE-BSA                                      |
|                     | Glc-b                                                                                 | Glc- $\beta$ - BSA                                                                                         |
|                     | GlcNAca1-4Galb                                                                        | GlcNAc $\alpha$ 1-4Gal $\beta$ -BSA                                                                        |
|                     | GlcNAc-b                                                                              | GlcNAc- $\beta$ - BSA                                                                                      |
|                     | GM1                                                                                   | Gal $\beta$ 1-3GalNAc $\beta$ 1-4(Sia $\alpha$ 2-3)Gal $\beta$ -4(Glc)-HSA (GM1)                           |
|                     | GM3                                                                                   | Sialy $\alpha$ 2-3Gal $\beta$ 1-4Glc-APD-HSA (GM3 )                                                        |
|                     | Isomaltose                                                                            | Glc $\alpha$ 1-6Glc $\beta$ -BSA (Isomalt)                                                                 |
|                     | LacNAc                                                                                | Gal $\beta$ 1-4GlcNAc – BSA (LacNAc,)                                                                      |
|                     | Lactose                                                                               | Gal $\beta$ 1-4Glc $\beta$ – BSA (Lac)                                                                     |
|                     | LeA                                                                                   | Gal $\beta$ 1-3[Fuca1-4]GlcNAc $\beta$ 1-3Gal $\beta$ 1-4Glc $\beta$ - BSA (Lea )                          |
|                     | LeB                                                                                   | Fuc $\alpha$ 1-2Gal $\beta$ 1-3[Fuca $\alpha$ 1-4]GlcNAc $\beta$ 1-3Gal $\beta$ 1-4Glc $\beta$ -BSA (Leb ) |
|                     | LeC                                                                                   | Gal $\beta$ 1-3GlcNAc $\beta$ – BSA (LeC)                                                                  |
|                     | LeX (dimeric)                                                                         | Di-LeX-APE-BSA                                                                                             |
|                     | LeX (monomeric)                                                                       | Gal $\beta$ 1-4[Fuca $\alpha$ 1-3]GlcNAc-APD-HSA (Lex)                                                     |
|                     | LeY                                                                                   | Fuc $\alpha$ 1-2Gal $\beta$ 1-4[Fuca $\alpha$ 1-3]GlcNAc –HSA (Ley)                                        |
|                     | LNnT                                                                                  | Gal $\beta$ 1-4GlcNAc $\beta$ 1-3Gal $\beta$ 1-BSA (LNnT)                                                  |
|                     | LNT                                                                                   | Gal $\beta$ 1-3GlcNAc $\beta$ 1-3Gal $\beta$ -BSA (LNT); 20/BSA                                            |
|                     | LSTa                                                                                  | Sia $\alpha$ 2-3Gal $\beta$ 1-3GlcNAc $\beta$ 1-3Gal $\beta$ 1-BSA (LSTa)                                  |

Wang et. al. Photo- and Bio-physical Studies of Lectin-Conjugated Fluorescent Nanoparticles: Reduced Sensitivity in High Density Assays.

| <b><u>Group</u></b> | <b><u>Abbreviation</u></b> | <b><u>Description</u></b>                                                                                                                                     |
|---------------------|----------------------------|---------------------------------------------------------------------------------------------------------------------------------------------------------------|
|                     | LSTb                       | Gal $\beta$ 1-3(Sia $\alpha$ 2-6)GlcNAc $\beta$ 1-3Gal $\beta$ 1-BSA (LSTb)                                                                                   |
|                     | LSTc                       | Sia $\alpha$ 2-6Gal $\beta$ 1-3GlcNAc $\beta$ 1-3Gal $\beta$ 1-BSA (LSTc)                                                                                     |
|                     | Maltohexaose               | Glc $\alpha$ 1-4Glc $\beta$ -BSA (Maltose)                                                                                                                    |
|                     | Maltose                    | Glc $\alpha$ 1-4Glc $\beta$ -BSA (Maltose)                                                                                                                    |
|                     | Man3                       | Man $\alpha$ 1-6(Man $\alpha$ 1-3)Man $\beta$ 1-4GlcNAc -BSA (Man3)                                                                                           |
|                     | Man5                       | Man $\alpha$ 1-6(Man $\alpha$ 1-3)Man $\alpha$ 1-6(Man $\alpha$ 1-3)Man $\beta$ 1-4GlcNAc-BSA (Man5)                                                          |
|                     | Man6                       | Man $\alpha$ 1-2Man $\alpha$ 1-3Man $\alpha$ 1-6(Man $\alpha$ 1-2Man $\alpha$ 1-3)Man $\beta$ 1-4GlcNAc-BSA (Man6)                                            |
|                     | Man7D1                     | Man $\alpha$ 1-6(Man $\alpha$ 1-3)Man $\alpha$ 1-6(Man $\alpha$ 1-2Man $\alpha$ 1-2Man $\alpha$ 1-3)Man $\beta$ 1-4GlcNAc-BSA (Man7D1)                        |
|                     | Man7D3                     | Man $\alpha$ 1-2Man $\alpha$ 1-6(Man $\alpha$ 1-3)Man $\alpha$ 1-6(Man $\alpha$ 1-2Man $\alpha$ 1-3)Man $\beta$ 1-4GlcNAc-BSA (Man7D3)                        |
|                     | Man8D1D3                   | Man $\alpha$ 1-2Man $\alpha$ 1-6(Man $\alpha$ 1-3)Man $\alpha$ 1-6(Man $\alpha$ 1-2Man $\alpha$ 1-2Man $\alpha$ 1-3)Man $\beta$ 1-4GlcNAc-BSA                 |
|                     | Man9                       | Man $\alpha$ 1-2Man $\alpha$ 1-6(Man $\alpha$ 1-2Man $\alpha$ 1-3)Man $\alpha$ 1-6(Man $\alpha$ 1-2Man $\alpha$ 1-2Man $\alpha$ 1-3)Man $\beta$ 1-4GlcNAc-BSA |
|                     | Man-a                      | Man- $\alpha$ - BSA                                                                                                                                           |
|                     | Man $\alpha$ 1-6Man-a      | Man $\alpha$ 1-6Man- $\alpha$ - BSA                                                                                                                           |
|                     | Man $\beta$ 4              | Man $\beta$ 1-4Man $\beta$ 1-4Man $\beta$ 1-4Man $\beta$ 1-BSA (Man $\beta$ 4)                                                                                |
|                     | ManT                       | Man $\alpha$ 1-6[Man $\alpha$ 1-3]Man $\beta$ -BSA [ManT]                                                                                                     |
|                     | P1                         | Gal $\alpha$ 1-4Gal $\beta$ 1-4GlcNAc-BSA (P1,)                                                                                                               |
|                     | Pk or Gb3                  | Gal $\alpha$ 1-4Gal $\beta$ 1-4Glc-HSA [Pk or Gb3]                                                                                                            |
|                     | pLNH                       | Gal $\beta$ 1-3GlcNAc $\beta$ 1-3Gal $\beta$ 1-4GlcNAc $\beta$ 1-3Gal $\beta$ 1-BSA (pLNH)                                                                    |
|                     | Rha-a                      | Rha- $\alpha$ – BSA                                                                                                                                           |
|                     | Rha-b                      | Rha- $\beta$ - BSA                                                                                                                                            |
|                     | Sialyl LeA                 | Sia $\alpha$ -LeA-APD-HSA (SLeA)                                                                                                                              |
|                     | Sialyl LeX                 | Sialyl $\alpha$ 2-3Gal $\beta$ 1-4[Fuc $\alpha$ 1-3]GlcNAc – BSA                                                                                              |
|                     | SSSG                       | AcSer-Ser-Ser-Gly-BSA                                                                                                                                         |
|                     | STnS                       | AcSer-(GalNAc $\alpha$ 1-)Ser-Ser-Gly-BSA (STnS); 22/BSA                                                                                                      |

Wang et. al. Photo- and Bio-physical Studies of Lectin-Conjugated Fluorescent Nanoparticles: Reduced Sensitivity in High Density Assays.

| <u>Group</u>  | <u>Abbreviation</u>         | <u>Description</u>                                                                                                   |
|---------------|-----------------------------|----------------------------------------------------------------------------------------------------------------------|
|               | TF di                       | Gal $\beta$ 1-3GalNAc $\beta$ – HSA (GA1di)                                                                          |
|               | Tn                          | AcGalNAc $\alpha$ 1-Thr-Gly-Hex                                                                                      |
|               | Tn3                         | Ac(GalNAc $\alpha$ 1-)Ser-(GalNAc $\alpha$ 1-)Ser-(GalNAc $\alpha$ 1-)Ser-Gly-Hex-BSA (Tn3); 15/BSA                  |
|               | TriLacNAc                   | Gal $\beta$ 1-4GlcNAc $\beta$ 1-3Gal $\beta$ 1-4GlcNAc $\beta$ 1-3Gal $\beta$ 1-4GlcNAc $\beta$ -APE-HSA (TriLacNAc) |
|               | X3Glc3                      | Xyl $\alpha$ 1-6Glc $\beta$ 1-4(Xyl $\alpha$ 1-6)Glc $\beta$ 1-4(Xyl $\alpha$ 1-6)Glc $\beta$ 1-BSA (X3Glc3)         |
|               | Xylb4                       | Xyl $\beta$ 1-4Xyl $\beta$ 1-4Xyl $\beta$ 1-4Xyl $\beta$ 1-BSA (Xyl $\beta$ 4)                                       |
|               | AGE30                       | Advanced glycation endproducts produced from Glc + BSA after 30 days (AGE30)                                         |
|               | AGE60                       | Advanced glycation endproducts produced from Glc + BSA after 60 days (AGE60)                                         |
| Glycoproteins | AGE90                       | Advanced glycation endproducts produced from Glc + BSA after 90 days (AGE90)                                         |
|               | Alpha-fetoprotein           | alpha fetoprotein                                                                                                    |
|               | Alpha-1-acid glycoprotein   | alpha1 Acid Glycoprotein                                                                                             |
|               | Asialo-BSM                  | Asialo-Bovine submaxillary mucin (aBSM, Tn, TF, GlcNAc $\beta$ 1-3GalNAc)                                            |
|               | Asialo-fetuin               | asialofetuin                                                                                                         |
|               | Asialo-glycophorin          | asialo-glycophorin (aGn)                                                                                             |
|               | Asialo-OSM                  | asialo-Ovine submaxillary mucin (aOSM)                                                                               |
|               | Asialo-OSM (enzyme treated) | Ovine submaxillary mucin treated with PNGase, fucosidase, galactosidase (almost all Tn)                              |
|               | BSM                         | Bovine submaxillary mucin (STn, STF, S-GlcNAc $\beta$ 1-3, ~20% of sialic acid is acetylated at 7,8, or 9)           |
|               | BSM (deacetylated)          | Deacetylated-Bovine submaxillary mucin (deAcBSM)                                                                     |
|               | CEA                         | carcinoembryonic antigen (CEA)                                                                                       |
|               | FABP                        | Fatty Acid Binding Protein (FABP)                                                                                    |
|               | Fetuin                      | fetuin                                                                                                               |
|               | Glycophorin                 | Glycophorin (Gn)                                                                                                     |

Wang et. al. Photo- and Bio-physical Studies of Lectin-Conjugated Fluorescent Nanoparticles: Reduced Sensitivity in High Density Assays.

| <u>Group</u> | <u>Abbreviation</u>  | <u>Description</u>                                                                                                 |
|--------------|----------------------|--------------------------------------------------------------------------------------------------------------------|
|              | hsp90                | Heat Shock Protein 90 (hsp90)                                                                                      |
|              | KLH                  | Keyhole limpet hemocyanin                                                                                          |
|              | KLH (oxidized)       | periodate oxidized Keyhole limpet hemocyanin                                                                       |
|              | OSM                  | Ovine submaxillary mucin (94% STn, 4% TF, 2% Fuca1-2Galβ1-3GalNAc; some Tn/GalNAc too)                             |
|              | OSM (enzyme treated) | Ovine submaxillary mucin treated with PNGase, fucosidase, galactosidase and N-acetylgalactosidase (almost all STn) |
|              | Ovalbumin            | ovalbumin                                                                                                          |
|              | PSA                  | Prostate Specific Antigen (PSA)                                                                                    |
|              | Tgl                  | Thyroglobulin (Tgl)                                                                                                |
|              | BSA#1                | Bovine serum albumin                                                                                               |
|              | Cy3                  | Cy3-labeled BSA                                                                                                    |
| Controls     | Cy5                  | Cy5-labeled BSA                                                                                                    |
|              | HSA                  | Human serum albumin (isolated from serum)                                                                          |
|              | rHSA                 | Human serum albumin (recombinant)                                                                                  |

**Linkers**

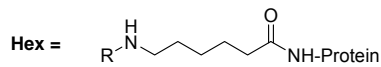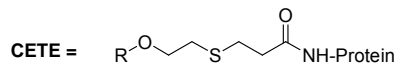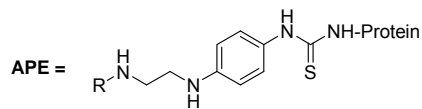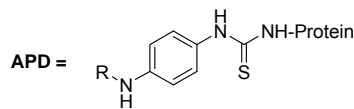



Wang et. al. Photo- and Bio-physical Studies of Lectin-Conjugated Fluorescent Nanoparticles: Reduced Sensitivity in High Density Assays.

Table S3. Alternate descriptions of the ConA-conjugate solutions used to incubate the carbohydrate microarrays.

| ConA Conjugate mass / mL           | ConA mass / mL              | Particle Number Density (# / mL)              | Dye Number density (# / mL)            |
|------------------------------------|-----------------------------|-----------------------------------------------|----------------------------------------|
| 0.1 mg ConA-f(TR)NP / mL           | 5 $\mu\text{g}^{\text{a}}$  | $0.98 \times 10^{12}$ f(TR)NP <sup>b</sup>    | $0.77 \times 10^{14}$ TR               |
| 0.5 mg ConA-f(TR)NP / mL           | 25 $\mu\text{g}^{\text{a}}$ | $4.9 \times 10^{12}$ f(TR)NP <sup>b</sup>     | $3.8 \times 10^{14}$ TR                |
| 0.5 $\mu\text{g}$ ConA-biotin / mL | 0.5 $\mu\text{g}$           | $5.9 \times 10^{12}$ ConA-biotin <sup>c</sup> | $0.18 \times 10^{14}$ Cy3 <sup>d</sup> |
| 5 $\mu\text{g}$ ConA-biotin / mL   | 5 $\mu\text{g}$             | $59 \times 10^{12}$ ConA-biotin <sup>c</sup>  | $1.8 \times 10^{14}$ Cy3 <sup>d</sup>  |

a) based on 50 $\mu\text{g}$  ConA / mg ConA-f(TR)NP (see text)

b) based of 46 nm diameter and 1.9 g/mL density

c) assumes ConA-biotin is dimeric. If primarily tetrameric, the numbers are twofold too large.

d) based on three Cy3 molecules per streptavidin and one streptavidin labeling each ConA biotin. Cy3 is not present in the ConA-biotin solution used to incubate the microarrays.
